1           **Dissecting the neural focus of attention reveals distinct processes for spatial**  
2           **attention and object-based storage in visual working memory.**

3  
4                   Nicole Hakim<sup>1,2,\*</sup>, Kirsten C. S. Adam<sup>1,2</sup>, Eren Günseli<sup>3</sup>,  
5                   Edward Awh<sup>1,2,4</sup> & Edward K. Vogel<sup>1,2,4</sup>  
6

- 7           1. Department of Psychology, University of Chicago, Chicago, IL.  
8           2. Institute for Mind and Biology, University of Chicago, Chicago, IL.  
9           3. Department of Psychology, Columbia University, New York, NY  
10          4. Grossman Institute for Neuroscience, Quantitative Biology, and Human Behavior,  
11          University of Chicago, Chicago, IL.  
12          \* Corresponding author

13  
14 **Running Head:** DISSECTING THE FOCUS OF ATTENTION

15  
16 **Figures:** 5

17  
18 **Tables:** 0

19  
20 **Key words:** visual working memory, attention, electroencephalogram, contralateral delay  
21 activity

22  
23 **Contributions:** All authors conceived and designed the experiments. N.H. and K.A.  
24 collected the data, performed analyses, and drafted the manuscript; N.H., K.A., E.A., and E.V.  
25 revised the manuscript.

26  
27 **Funding:** Research was supported by NIMH grant 5R01 MH087214-08 and Office of Naval  
28 Research grant N00014-12-1-0972.

29  
30 **Data Availability:** Datasets for all experiments will become available online on Open  
31 Science Framework upon acceptance of the manuscript or reviewer request:  
32 [https://osf.io/ws3j9/?view\\_only=40b7f0018df44d5a862b51601d4599ed](https://osf.io/ws3j9/?view_only=40b7f0018df44d5a862b51601d4599ed).

33  
34 **Conflicts of Interest:** none

35 **Correspondence to:**

36 Nicole Hakim  
37 University of Chicago  
38 940 E 57<sup>th</sup> St, Chicago, IL 60637  
39 (773)-795-4784  
40 [nhakim@uchicago.edu](mailto:nhakim@uchicago.edu)

41  
42  
43  
44  
45  
46

47  
48  
49  
50  
51  
52  
53  
54  
55  
56  
57  
58  
59  
60  
61  
62  
63  
64  
65  
66  
67  
68  
69  
70  
71  
72  
73  
74  
75  
76  
77  
78  
79  
80  
81  
82  
83  
84  
85  
86  
87  
88  
89  
90  
91  
92

### Abstract

Working memory (WM) maintains relevant information in an accessible state, and is composed of an active focus of attention and passive offline storage. Here, we dissect the focus of attention by showing that distinct neural signals index the online storage of objects and sustained spatial attention. We recorded EEG activity during two tasks that employed identical stimulus displays while the relative demands for object storage and spatial attention varied. Across four experiments, we found dissociable delay-period signatures for an attention task (which only required spatial attention) and WM task (which invoked both spatial attention and object storage). Although both tasks required active maintenance of spatial information, only the WM task elicited robust contralateral delay activity that was sensitive to the number of items in the array. Thus, we argue that the focus of attention is maintained via the combined operation of distinct processes for covert spatial orienting and object-based storage.

93 **Introduction**

94 Working memory (WM) facilitates the temporary maintenance of small amounts of  
95 information so that it can be manipulated or acted upon. Contemporary theories of WM  
96 have coalesced on variations of embedded process models (Cowan, 1999; Oberauer, 2002)  
97 in which performance in WM tasks depends upon memory mechanisms that represent  
98 information in two distinct states: an online, active state (“focus of attention”); and an  
99 offline, passive state (“silent WM”). The focus of attention generally refers to information  
100 that is currently “in mind”, whereas silent WM is information that was recently within the  
101 focus but can still be rapidly accessed. These two states of WM representation have been  
102 proposed to be implemented at the neural level through persistent neural firing for items  
103 within the focus (Curtis & D’Esposito, 2003) and via rapid synaptic plasticity that allows  
104 recently attended items to quickly be reinstated (Jonides, Lacey, & Nee, 2015; Lewis-  
105 Peacock, Drysdale, Oberauer, & Postle, 2012; Rose et al., 2016; Stokes, 2015; Wolff, Jochim,  
106 Akyurek, & Stokes, 2017).

107 Here, we seek to characterize the neural mechanisms supporting the focus of  
108 attention. Broad neuroscientific support for focus of attention-related activity has been  
109 observed in sustained neural firing in monkey electrophysiological studies (Buschman,  
110 Siegel, Roy, & Miller, 2011; Funahashi, Chafee, & Goldman-Rakic, 1993), uni- and multi-  
111 variate measurements of BOLD in human fMRI studies (Todd & Marois, 2004; Xu & Chun,  
112 2006), and sustained electrical and magnetic fluctuations in human EEG and MEG studies  
113 (van Dijk, van der Werf, Mazaheri, Medendorp, & Jensen, 2010; Vogel & Machizawa, 2004).  
114 Within EEG and MEG studies, two candidate measures are consistent with the focus of  
115 attention construct. The first is alpha power (8-12hz), which shows sustained modulations  
116 during the retention period and has been shown to contain precise spatial information  
117 about the remembered/attended stimulus (Foster, Bsales, Jaffe, & Awh, 2017; Foster,  
118 Sutterer, Serences, & Awh, 2016). Another candidate is the Contralateral Delay Activity  
119 (CDA), which is a sustained negativity over the hemisphere contralateral to the positions of  
120 to-be-remembered items. CDA amplitude is modulated by the number of items held in WM,  
121 reaches an asymptote once WM capacity is exhausted, and predicts individual differences  
122 in WM capacity (Unsworth, Fukuda, Awh, & Vogel, 2014; Vogel & Machizawa, 2004; Vogel,  
123 Mccollough, & Machizawa, 2005). A prevailing view of the CDA is that it tracks the number  
124 of task-relevant objects that are stored in WM (Balaban & Luria, 2017; Luria, Balaban, Awh,  
125 & Vogel, 2016).

126 While the literatures on the CDA and alpha power have largely developed  
127 independently, recent proposals claim that they reflect isomorphic measures of the focus of  
128 attention. Specifically, van Dijk, et al. (2010) argued that the CDA is essentially an averaging  
129 artifact of trial-level alpha modulation, and, therefore, reflects attention to the spatial  
130 positions of the memoranda, rather than representations of items in WM. A similar  
131 proposal was made by Berggren & Eimer (2016), who found that when two arrays were  
132 presented sequentially in different hemifields, CDA amplitude tracked the positions of the  
133 most recently seen items (but also see: Feldmann-Wüstefeld & Vogel, 2018). Such spatial  
134 attention accounts make two broad, but untested assertions regarding neural measures of  
135 the focus of attention. First, that sustained EEG activity reflecting the focus of attention  
136 exclusively represents the current regions of attended space, rather than the online  
137 maintenance of the items that occupy those regions of space (Berggren & Eimer, 2016).  
138 Second, that such neural measures amount to a monolithic “focus of attention,” rather than

139 a collection of distinct but overlapping mechanisms that together comprise the focus of  
140 attention.

141 Here, we provide evidence that the focus of attention in WM is not a monolithic  
142 construct, but rather, involves at least two neurally separable processes: (1) attention to  
143 regions in space (2) representations of objects that occupy the attended regions (i.e., object  
144 files). Alpha activity, but not the CDA, tracked attention to relevant spatial positions.  
145 Conversely, when participants stored object representations, lateralized alpha activity that  
146 tracked the attended positions was accompanied by robust, load-sensitive CDA activity.  
147 These results suggest the neural focus of attention can be dissected into at least two  
148 complementary, but distinct facets of activity: a map of prioritized space and  
149 representation of object information in active memory.

## 150 **General Methods**

### 151 **Experimental Design**

152 Our broad strategy was to compare delay period activity across two tasks that  
153 employed physically identical displays but distinct cognitive requirements. We designed  
154 distinct “Attention” and “WM” tasks to disentangle the neural correlates of hypothesized  
155 sub-components of the focus of attention. Both tasks are known to recruit sustained spatial  
156 attention (i.e. representation of a spatial priority map), but only the WM task required  
157 online storage of items (i.e. representation of the objects which occupied the attended  
158 locations). For all experiments, participants completed both a WM task and an attention  
159 task, and the sequence of physical stimuli was identical for both tasks; the attention and  
160 WM tasks differed only in the instructions given to participants and in the response  
161 mapping to keys. In Experiment 1, the WM task required that participants remember the  
162 color of the items in the sample array, whereas the attention condition required  
163 participants to direct spatial attention towards the locations of the items in the sample  
164 array (item color was irrelevant). Although highly similar, one key difference between the  
165 tasks in Experiment 1 was that participants were required to remember non-spatial  
166 features only in the WM task. To test whether the requirement to remember non-spatial  
167 features was responsible for our findings in Experiment 1, we eliminated this difference to  
168 make the tasks even more similar in Experiment 2; the WM task required that participants  
169 *store the spatial positions of items* in the sample array, and the attention task required that  
170 participants *covertly attend spatial positions* in anticipation of rare targets during the delay.

### 171 **Participants**

172 Experimental procedures were approved by the University of Chicago Institutional  
173 Review Board. All participants gave informed consent and were compensated for their  
174 participation with cash payment (\$15 per hour); participants reported normal color vision  
175 and normal or corrected-to-normal visual acuity. Participants were recruited from the  
176 University of Chicago and surrounding community. For each sub-experiment (e.g., Exp. 1a),  
177 we set a minimum sample size of 20 subjects (after attrition and artifact rejection). This  
178 minimum sample size was chosen to ensure that we would be able to robustly detect set-  
179 size dependent delay activity. Prior work employing sample sizes of 10 to 20 subjects per  
180 experiment can robustly detect set-size dependent CDA activity (Vogel & Machizawa, 2004;  
181 Vogel et al., 2005), and differences in CDA amplitude between novel experimental  
182 conditions (Balaban & Luria, 2017). We chose a minimum sample size toward the upper  
183 end of this conventional range.

184 A total of 63 and 54 participants were run in Experiments 1 and 2, respectively. Due

185 to a technical error, EEG activity was not recorded for 3 participants in Experiment 1. In  
186 addition, data from some participants was excluded because of excessive EEG artifacts  
187 (<120 trials remaining in any of the four experimental conditions) or poor behavioral  
188 performance. This left 48 subjects in Experiment 1 (28 in Experiment 1a, 20 in Experiment  
189 1b), and 49 subjects in Experiment 2 (20 in Experiment 2a, 29 in Experiment 2b).

### 190 **EEG Acquisition**

191 Participants were seated inside an electrically shielded chamber, with their heads  
192 resting on a padded chin-rest 74 cm from the monitor. We recorded EEG activity from 30  
193 active Ag/AgCl electrodes (Brain Products actiCHamp, Munich, Germany) mounted in an  
194 elastic cap positioned according to the International 10-20 system [Fp1, Fp2, F7, F8, F3, F4,  
195 Fz, FC5, FC6, FC1, FC2, C3, C4, Cz, CP5, CP6, CP1, CP2, P7, P8, P3, P4, Pz, PO7, PO8, PO3, PO4,  
196 O1, O2, Oz]. Two additional electrodes were affixed with stickers to the left and right  
197 mastoids, and a ground electrode was placed in the elastic cap at position Fpz. Data were  
198 referenced online to the right mastoid and re-referenced offline to the algebraic average of  
199 the left and right mastoids. Incoming data were filtered [low cut-off = .01 Hz, high cut-off =  
200 80 Hz, slope from low- to high-cutoff = 12 dB/octave] and recorded with a 500 Hz sampling  
201 rate. Impedance values were kept below 10 k $\Omega$ .

202 Eye movements and blinks were monitored using electrooculogram (EOG) activity  
203 and eye-tracking. We collected EOG data with 5 passive Ag/AgCl electrodes (2 vertical EOG  
204 electrodes placed above and below the right eye, 2 horizontal EOG electrodes placed ~1 cm  
205 from the outer canthi, and 1 ground electrode placed on the left cheek). We collected eye-  
206 tracking data using a desk-mounted EyeLink 1000 Plus eye-tracking camera (SR Research  
207 Ltd., Ontario, Canada) sampling at 1,000 Hz. Usable eye-tracking data were acquired for 25  
208 out of 28 participants in Experiment 1a, 19 out of 20 participants in Experiment 1b, 17 out  
209 of 20 participants in Experiment 2a, and 29 out of 29 participants in Experiment 2b.

### 210 **Artifact rejection**

211 Eye movements, blinks, blocking, drift, and muscle artifacts were first detected by  
212 applying automatic detection criteria. After automatic detection, trials were manually  
213 inspected to confirm that detection thresholds were working as expected. Subjects were  
214 excluded if they had fewer than 120 total trials remaining in any of the 4 conditions. In  
215 Experiment 1a, we rejected an average 25% of trials across all four conditions. This left us  
216 with an average of 282 trials in WM set size 2 condition, 275 trials in the WM set size 4  
217 condition, 302 trials in the Attention set size 2 condition, and 302 trials in the Attention set  
218 size 4 condition. In Experiment 1b, we rejected an average of 32% of trials across all four  
219 conditions. This left us with an average of 291 trials in the WM set size 2 condition, 285  
220 trials in the WM set size 4 condition, 320 trials in the attention set size 2 condition, and 320  
221 trials in the attention set size 4 condition. In Experiment 2a, we rejected an average of 22%  
222 of trials across all four conditions. This left us with an average of 302 trials in the WM set  
223 size 2 condition, 301 trials in the WM set size 4 condition, 322 trials in the attention set size  
224 2 condition, and 323 trials in the attention set size 4 condition. In Experiment 2b, we  
225 rejected an average of 27% of trials across all four conditions. This left us with an average  
226 of 283 trials in the WM set size 2 condition, 283 trials in the WM set size 4 condition, 298  
227 trials in the attention set size 2 condition, and 295 trials in the attention set size 4  
228 condition.

229 **Eye movements.** We used a sliding window step-function to check for eye  
230 movements in the HEOG and the eye-tracking gaze coordinates. For HEOG rejection, we



231 used a split-half sliding window approach (window size = 100 ms, step size = 10 ms,  
232 threshold = 20  $\mu\text{V}$ ). We only used the HEOG rejection if the eye tracking data were bad for  
233 that trial epoch. We slid a 100 ms time window in steps of 10 ms from the beginning to the  
234 end of the trial. If the change in voltage from the first half to the second half of the window  
235 was greater than 20  $\mu\text{V}$ , it was marked as an eye movement and rejected. For eye-tracking  
236 rejection, we applied a sliding window analysis to the x-gaze coordinates and y-gaze  
237 coordinates (window size = 100 ms, step size = 10 ms, threshold = 0.5° of visual angle).

238 **Blinks.** We used a sliding window step function to check for blinks in the VEOG  
239 (window size = 80 ms, step size = 10 ms, threshold = 30  $\mu\text{V}$ ). We checked the eye-tracking  
240 data for trial segments with missing data-points (no position data is recorded when the eye  
241 is closed).

242 **Drift, muscle artifacts, and blocking.** We checked for drift (e.g. skin potentials) by  
243 comparing the absolute change in voltage from the first quarter of the trial to the last  
244 quarter of the trial. If the change in voltage exceeded 100  $\mu\text{V}$ , the trial was rejected for drift.  
245 In addition to slow drift, we checked for sudden step-like changes in voltage with a sliding  
246 window (window size = 100 ms, step size = 10 ms, threshold = 100  $\mu\text{V}$ ). We excluded trials  
247 for muscle artifacts if any electrode had peak-to-peak amplitude greater than 200  $\mu\text{V}$   
248 within a 15 ms time window. We excluded trials for blocking if any electrode had at least  
249 30 time-points in any given 200-ms time window that were within 1 $\mu\text{V}$  of each other.

#### 250 **Analysis of Horizontal Gaze Position**

251 We rejected all trials that had eye movements greater than 0.5° of visual angle.  
252 Nevertheless, participants could still move their eyes within the 0.5° of visual angle  
253 threshold (e.g. microsaccades). To compare eye movements in the two tasks, we compared  
254 the horizontal gaze position recorded by the eye tracker. We were most concerned with  
255 horizontal eye movements, as these could contaminate our lateralized EEG measures. We  
256 drift-corrected gaze position data by subtracting the mean gaze position measured 200 ms  
257 before the pre-cue to achieve optimal sensitivity to changes in eye position (Cornelissen,  
258 Peters, & Palmer, 2002). We then took the mean change in gaze position (in degrees of  
259 visual angle) for left and right trials during same time-window that we used in the CDA  
260 analysis, 400 to 1450 ms after stimulus onset. Eye gaze values from left trials were sign-  
261 reversed so that left and right trials could be combined together. As such, positive values  
262 indicate eye movements toward the remembered side, and negative values indicate eye  
263 movements away from the remembered side. Importantly, not all participants had eye  
264 tracking with adequate quality to be included in this analysis. Therefore, only 25  
265 participants from Experiment 1a, 19 participants from Experiment 1b, 17 participants from  
266 Experiment 2a, and 27 participants from Experiment 2b were included in the analysis.

#### 267 **Analysis of Pupil Dilation**

268 As an additional metric of task difficulty, we compared task-evoked pupil dilation  
269 between the WM and attention tasks. Many studies have demonstrated that task-evoked  
270 pupil dilation correlates with cognitive load; the pupil dilates more when there are higher  
271 attentional and working memory demands (Beatty, 1982; Steinhauer & Hakerem, 1992).  
272 Since we were most interested in assessing the relative difficulty of the two tasks, we  
273 collapsed the data across set size within each task. For our analysis, pupil dilation data  
274 were baselined from 400 to 0 ms before the onset of the colored squares. Differences in  
275 pupil dilation between the WM and attention tasks (collapsed across set sizes) were

276 calculated by comparing pupil size during the same time-window as is used in the CDA  
277 analysis (400 to 1450 ms after stimulus onset). Just as in the analysis of horizontal gaze  
278 position, not all participants had eye tracking that was good enough to be included in this  
279 analysis. The same participants were included in both the horizontal gaze position and  
280 pupil dilation analyses.

### 281 **Analysis of contralateral delay activity**

282 EEG activity was baselined from 400 ms to 0 ms before the onset of the stimulus  
283 array. Trials containing targets for the attention task were excluded. Event-related  
284 potentials were calculated by averaging baselined activity at each electrode across all  
285 accurate trials within each condition (Set-Size 2 WM, Set-Size 4 WM, Set-Size 2 Attention,  
286 and Set-Size 4 Attention). We calculated amplitude of contralateral and ipsilateral activity  
287 for five posterior and parietal pairs of electrodes chosen a priori based on prior literature:  
288 O1/O2, PO3/PO4, PO7/PO8, P3/P4, and P7/P8. Statistical analyses were performed on  
289 data that was not filtered beyond the .01 – 80 Hz online data acquisition filter; we low-pass  
290 filtered data (30 Hz) for illustrative purposes in paper figures.

### 291 **Analysis of lateralized alpha power**

292 EEG signal processing was performed in MATLAB 2015a (The MathWorks, Natick,  
293 MA). We band-pass filtered trial epochs in the alpha band (8-12 Hz) using a bandpass filter  
294 from the FieldTrip toolbox (Oostenveld, Fries, Maris, & Schoffelen, 2011;  
295 'ft\_preproc\_bandpass.m') and then extracted instantaneous power by applying a Hilbert  
296 transform ('hilbert.m') to the filtered data. Trials containing targets for the attention task  
297 were excluded. We calculated alpha power for the same five posterior and parietal pairs of  
298 electrodes as CDA activity: O1/O2, PO3/PO4, PO7/PO8, P3/P4, and P7/P8.

## 299 **Experiment 1**

### 300 **Materials & Methods**

#### 301 **Stimuli & Procedures**

302 Stimuli in all experiments were presented on a 24-inch LCD computer screen (BenQ  
303 XL2430T; 120 Hz refresh rate) on a Dell Optiplex 9020 computer. Participants were seated  
304 with a chin-rest 74 cm from the screen. Stimuli were presented on a gray background, and  
305 participants fixated a small black dot with a diameter of approximately 0.2 degrees of  
306 visual angle. We ran two very similar versions of Experiment 1 (hereafter referred to as  
307 Experiments 1a and 1b). The stimuli and procedures for Experiments 1a and 1b were  
308 almost identical, with the exception of the differences noted below. Each trial began with a  
309 blank inter-trial interval (750 ms), followed by a diamond cue (300 ms) indicating the  
310 relevant side of the screen (right or left). This diamond cue (0.65° maximum width, 0.65°  
311 maximum height) was centered 0.65° above the fixation dot and was half green (RGB = 74,  
312 183, 72) and half pink (RGB = 183, 73, 177). Half of the participants were instructed to  
313 attend the green side and the other half were instructed to attend the pink side. After the  
314 cue, 2 or 4 colored squares (Exp. 1: 1.1° by 1.1°; Exp. 2: 1° by 1°) briefly appeared in each  
315 hemifield (150 ms) then disappeared for a 1,300 ms delay period. Squares could appear  
316 within a subset of the display subtending 3.1° to the left or right of fixation and 3.5° degrees  
317 above and below fixation. Colors for the squares were selected randomly from a set of 9  
318 possible colors (Red = 255 0 0; Green = 0 255 0; Blue = 0 0 255; Yellow = 255 255 0;  
319 Magenta = 255 0 255; Cyan = 0 255 255; Orange = 255 128 0; White = 255 255 255; Black =  
320 1 1 1). Colors were chosen without replacement within each hemifield, and colors could be  
321 repeated across, but not within, hemifields. On 10% of trials, two small, black lines (0.02°

322 wide, 0.4° long) appeared (66.7 ms), one at the location of a colored square in the cued  
323 hemifield, and one at the location of a colored square in the un-cued hemifield. The lines  
324 could appear at any point during the delay period from 100 to 1200 ms after the offset of  
325 the stimuli. Each line could be tilted 31.3 degrees to the left or 31.3 degrees to the right. At  
326 test, a probe display appeared until response, consisting of 1 colored square in each  
327 hemifield.

328 Participants in both Experiment 1a and 1b completed a WM task and an attention  
329 task (Figure 1). Within each experiment, the sequence of physical stimuli was identical for  
330 both tasks. Differences in procedures for Experiment 1a and 1b are described below. The  
331 attention and WM tasks differed only in the instructions given to participants and in the  
332 keys used to respond. Task order (attention first or WM first) and relevant cue color (pink  
333 or green) were counterbalanced across participants. Participants completed 20 blocks of  
334 80 trials each (1,600 trials total, 400 per condition).  
335

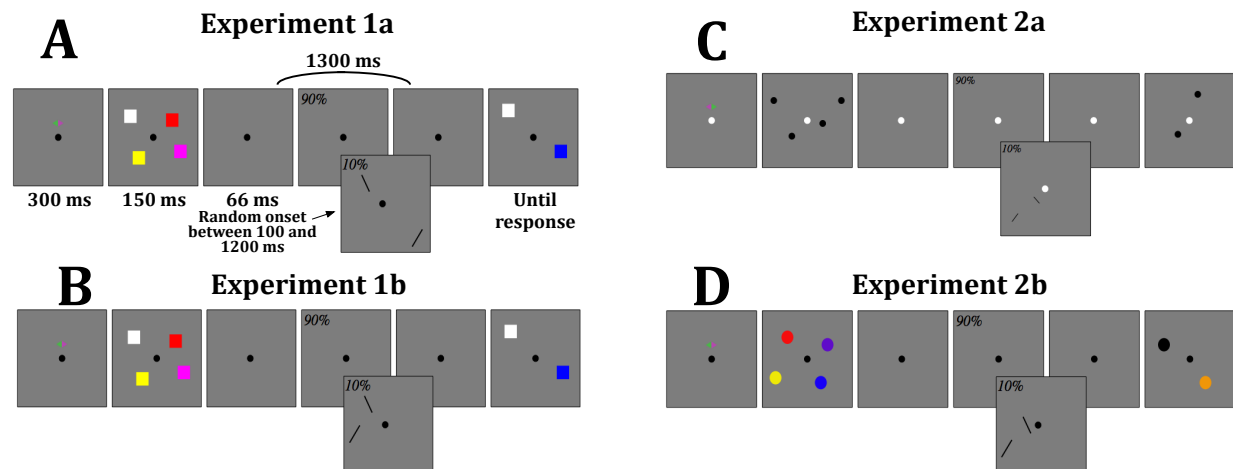

336 **Figure 1.** Working memory and attention tasks for all experiments. At the start of each trial, a cue appeared  
337 on the screen for 300 ms, which cued participants to attend one side of the screen. Then, an array of 2 or 4  
338 colored squares (Exp. 1a & 1b) or circles (Exp. 2a & 2b) briefly appeared (150 ms). On 10% of trials, during  
339 the blank retention interval (1300 ms), two small lines appeared for 66 ms between 100 and 1200 ms after  
340 memory array offset. In Experiment 1a, one line appeared in each hemifield. In all other experiments, both  
341 lines appeared in the same hemifield, one in an attended location and one in an unattended location. After the  
342 retention interval, a response screen appeared with one square (Exp. 1a & 1b) or circle (Exp. 2a & 2b) in each  
343 hemifield. In the WM task, to respond, participants reported whether the square (Exp. 1a & 1b) or circle (Exp.  
344 2a & 2b) that reappeared in the attended hemifield was the same color (Exp. 1a & 1b) or in the same location  
345 (Exp. 2a & 2b). Participants pressed “z” if it was the same color (Exp. 1a & 1b) or location (Exp. 2a & 2b) and  
346 “/?” if it was different. In the Attention task, if a line was not present during the delay period, participants  
347 pressed “spacebar.” If a line was present during the delay, participants had to report the orientation of the  
348 line that appeared in one of the cued locations. If the line was tilted left, participants pressed “z” and if it was  
349 tilted right, participants pressed “/?” The response screen remained visible until a response was made.  
350

351

352 **Working Memory Task.** Participants were instructed to remember the colors of  
353 the presented squares in the cued hemifield and to ignore the lines that might flash during  
354 the middle of the delay period. At test, participants were asked to identify whether the  
355 color presented at the relevant probed location was the same as the color held in mind  
356 (same trial) or different (change trial). The colors changed on 50% of trials. Participants  
357 pressed the “z” key to indicate the response “same” and pressed the “/” key to indicate



358 “different”.

359 **Attention Task.** Participants were instructed to maintain their attention at the  
360 locations of the presented squares in the cued hemifield in order to identify the orientation  
361 of a small line that appeared at one of the attended locations on 10% of trials. Participants  
362 were instructed to press the “z” key if the line appeared and was tilted left, and the “/” key  
363 if the line appeared and was tilted right. On 90% of trials, no line was presented, and  
364 participants were instructed to press the “space” key to indicate that there was no target  
365 present. The physical stimulus displays were identical to the memory task; thus, one  
366 colored square appeared in each hemifield at the end of the attention trials. Participants  
367 were told that the appearance of the test display indicated that it was time to respond, and  
368 that the location and the color of the squares were irrelevant to the task.

369 Stimuli and procedures for Experiment 1b differed only for the target-present trials  
370 (10% of trials). Specifically, during target-present trials, we presented both a relevant and  
371 an irrelevant line within the cued hemifield. One line always appeared at the same location  
372 as one of the colored squares; the second line appeared at a foil location where no colored  
373 square had been presented (a minimum distance of 0.75 items’ width from any of the  
374 colored squares’ locations). Thus, the participants were required to maintain their  
375 attention at precise locations within the relevant hemifield so that they knew which line to  
376 report. We reasoned that the inclusion of an irrelevant item in the cued hemifield in  
377 Experiment 1b would encourage subjects to orient attention more precisely. However,  
378 subsequent analyses revealed no main effect or interactions associated with the changes in  
379 procedure between Experiment 1a and 1b. Therefore, data were collapsed across these two  
380 versions of the task.

## 381 Results

### 382 Rationale for Collapsing Experiment 1a and 1b

383 In a preliminary analysis, we examined whether the small variations in the task  
384 design between Experiments 1a and 1b had an effect on the observed results. For this  
385 purpose, we ran repeated-measures ANOVAs for each analysis (e.g. Behavior, CDA, etc.)  
386 with the within-subjects factors Task (WM, Attention) and Set Size (2, 4 items) and the  
387 between-subjects factor Experiment (1a, 1b). With one exception (described next) there  
388 was no main effect of Experiment and no interaction of Experiment with any other factor,  
389  $p \geq .49$ . For the CDA analysis, there was a significant interaction of Laterality, Task, and  
390 Experiment,  $F(46)=4.28$ ,  $p=.04$ ,  $\eta_p^2=.09$ . To explore whether task lateralization varied  
391 across experiments, we ran a repeated-measures ANOVA with the factors Laterality  
392 (contra, ipsi) and Task (WM, Attention) for Experiment 1a and 1b separately. For both  
393 experiments, there was a significant interaction of Laterality and Task,  $p<.001$ . Specifically,  
394 there was a larger difference in laterality between the two tasks for Experiment 1a ( $M=-.50$ ,  
395  $SD=.33$ ) than for Experiment 1b ( $M=-.31$ ,  $SD=.31$ ). The triple interaction between  
396 Laterality, Task and Experiment was not important for our central question which focused  
397 on the cognitive processes that yield lateralized activity. Thus, the data were collapsed  
398 across Experiments 1a and 1b.

### 399 Behavior

#### 400 Working memory

401 WM performance (Figure 2) was converted to a capacity score,  $K$ , calculated as  $K = N$   
402  $\times (H-FA)$ .  $N$  is the set-size;  $H$  is the hit rate; and  $FA$  is the false alarm rate (Cowan, 2001). We  
403 only analyzed “target absent” trials, as we excluded “target present” trials (10% of total

404 trials) from the CDA and alpha analyses. For the WM trials, we compared performance  
405 between set size 2 and set size 4 using a two-tailed, paired-samples t-test. There was a  
406 significant difference in K score between set size 2 and 4,  $t(47) = -3.14$ ,  $p = .003$ . Although the  
407 effect was smaller than usual, participants remembered significantly more items on set size  
408 4 trials ( $M = 1.73$ ,  $SD = .77$ ) than set size 2 trials ( $M = 1.52$ ,  $SD = .40$ ).

#### 409 Attention

410 Accuracy (Figure 2) was essentially at ceiling for detecting whether a line was  
411 present (Set Size 2:  $M = .99$ ,  $SD = .01$ ; Set Size 4:  $M = .97$ ,  $SD = .02$ ). On the rare trials in which  
412 lines were presented, participants correctly reported the orientation of the target line more  
413 frequently on set size 2 ( $M = .82$ ,  $SD = .13$ ) trials than on Set Size 4 ( $M = .78$ ,  $SD = .15$ ) trials,  
414  $t(47) = 2.56$ ,  $p = .01$ . Thus, monitoring four locations was more difficult than monitoring two  
415 locations.

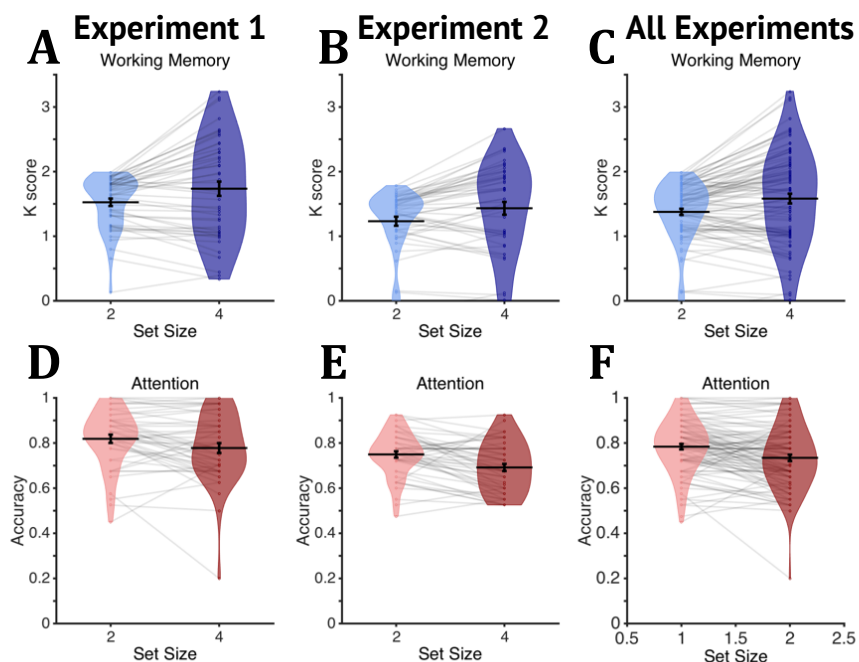

416  
417 **Figure 2.** Behavioral performance. (A-C) Average K score in the WM task for each experiment. The  
418 distribution of K scores for all participants is represented by the violin plot. Dots and light gray lines  
419 represent one participant's performance. (D-F) Average accuracy in the Attention tasks for each experiment.

420

#### 421 Contralateral Delay Activity

422 Recall that the WM condition required participants to direct attention to one side  
423 and store the colors of the objects in WM, while the attention task required only the  
424 deployment of spatial attention without storage of the objects in the sample array. Thus,  
425 the central goal of Experiment 1 was to test whether CDA activity entails the storage of  
426 individuated items, or whether the deployment of spatial attention is sufficient to generate  
427 a CDA. As shown in Figure 3, CDA activity was observed only in the WM condition.

428 The CDA manifests as an increased negativity contralateral to the items stored in  
429 working memory. Thus, to characterize the apparent differences in CDA amplitude across  
430 task, we ran a 2x2x2 repeated-measures ANOVA with the factors Laterality (contra, ipsi),  
431 Task (WM, attention), and Set Size (2, 4 items) on data averaged from 400 to 1450 ms after  
432 stimulus onset. In this analysis, a significant effect of Laterality (i.e., greater negativity

433 contralateral than ipsilateral to the sample array) provides evidence for reliable CDA  
434 activity. This analysis revealed a significant main effect of Laterality,  $F(1,47)=36.26, p<.001,$   
435  $\eta_p^2=.44,$  and Set Size,  $F(1,47)=12.85, p=.001, \eta_p^2=.21.$  There was also a significant 2-way  
436 interaction of Laterality and Task,  $p<.001,$  and a significant three-way interaction of  
437 Laterality, Task, and Set Size,  $F(1,47)=4.96, p=.03, \eta_p^2=.10.$  No other effects were  
438 significant,  $p>=.60.$

439 To characterize the significant interactions, we ran separate repeated-measures  
440 ANOVAs for the WM and Attention tasks, with the within-subjects factors Laterality  
441 (contra, ipsi) and Set Size (2, 4 items). For the WM task, there was a significant main effect  
442 of Set Size,  $F(1,47)=6.56, p=.01, \eta_p^2=.12,$  and of Laterality,  $F(1,47)=66.59, p<.001, \eta_p^2=.59.$   
443 The main effect of Set Size does not provide information about the CDA component,  
444 because the effect was found in data collapsed across Laterality. The main effect of  
445 Laterality, however, demonstrates that there was reliable CDA activity in the WM  
446 condition. For the Attention task, the repeated measures ANOVA revealed a significant  
447 main effect of Set Size,  $F(1,47)=10.07, p=.003, \eta_p^2=.18.$  Again, this effect is not diagnostic  
448 regarding CDA activity, because the data were collapsed across laterality. Critically, there  
449 was no main effect of Laterality in the Attention task,  $F(1,47)=.95, p=.33, \eta_p^2=.02,$   
450 suggesting that deploying covert attention to the locations of the sample items was not  
451 sufficient to drive CDA activity.

452 Finally, the three-way interaction between Laterality, Set Size, and Task reflects the  
453 finding that set size effects in the attention task went modestly in the opposite direction of  
454 a typical CDA, with greater negativity in the set size 2 condition ( $M=-.07, SD=.29$ ) than in the  
455 set size 4 condition ( $M=.001, SD=.29$ ). This was not the case for the WM condition. One  
456 unusual finding was that we did not observe a significant interaction between Set Size and  
457 Laterality on the CDA amplitude in the WM task, despite many past demonstrations that  
458 CDA activity is sensitive to changes in mnemonic load (Luria et al., 2016). CDA activity was  
459 numerically higher with the larger set size, but this was not statistically reliable. We think  
460 this may be due to unusually low WM performance for this group of subjects. While  
461 participants stored significantly more items in the set size 4 condition compared to the set  
462 size 2 condition, this difference was quite small (about 0.1 items); this modest difference in  
463 the number of items stored in the two conditions probably explains why a reliable change  
464 in CDA amplitude was not observed. Nevertheless, Experiment 2 will replicate the core  
465 empirical pattern while revealing a clear effect of WM load on CDA amplitude.  
466 Furthermore, aggregate analysis of CDA activity across Experiments 1 and 2 will also show  
467 a robust set size effect in line with past findings in the literature.

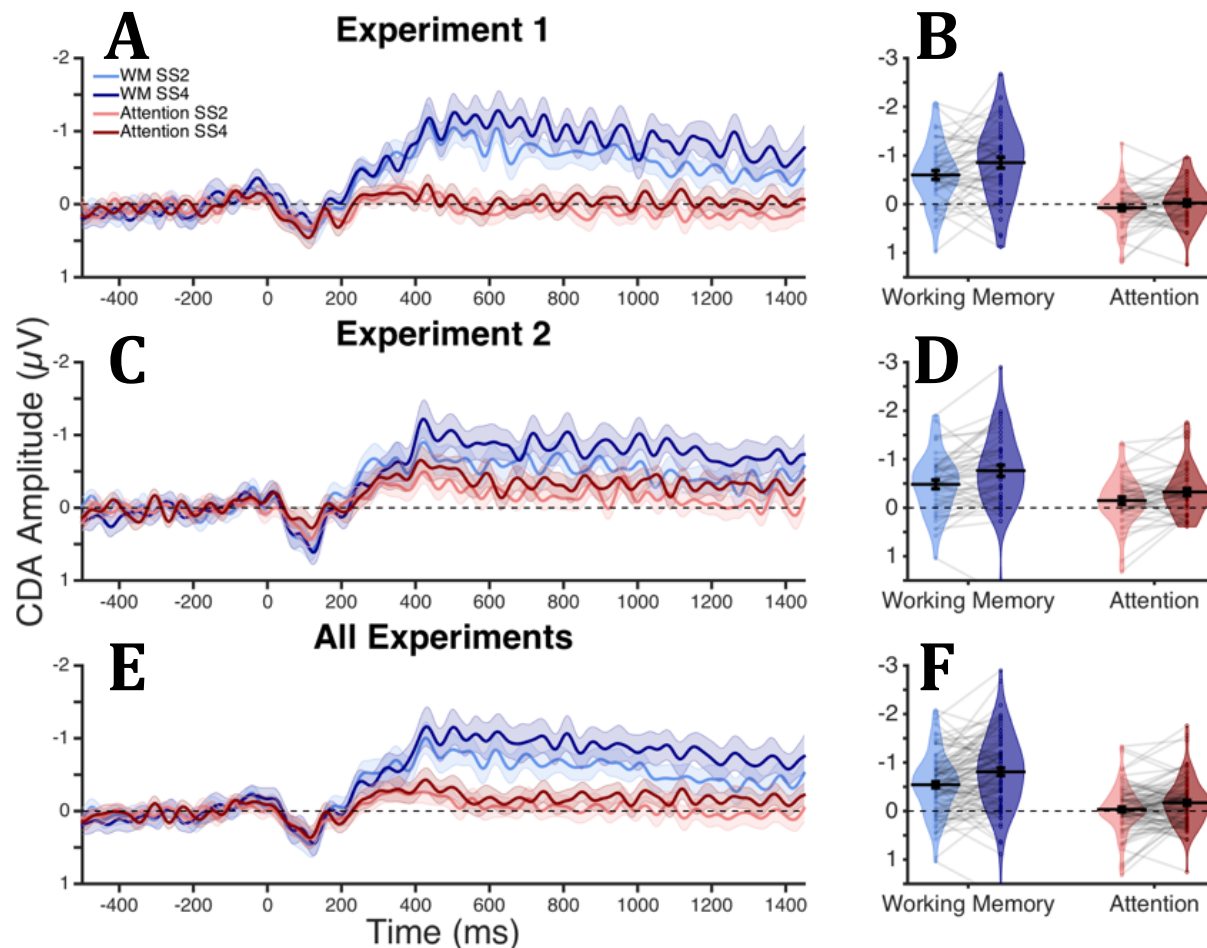

468  
469

470 **Figure 3.** Contralateral delay activity. (A) CDA amplitude ( $\mu\text{V}$ ) over time for Experiment 1. Timepoint zero  
471 marks the onset of the memory array, and timepoint 1450 marks the onset of the response array. (B) Average  
472 CDA amplitude ( $\mu\text{V}$ ) for Experiment 1 during the time window of interest, 400 to 1450 ms. The distribution of  
473 CDA amplitudes for all participants is represented by the violin plot. Dots and light gray lines represent one  
474 participant's CDA amplitude. (C, D) CDA for Experiment 2. (E, F) CDA for All Experiments combined.

475

476 To summarize the CDA analysis for Experiment 1, the pattern of CDA activity was  
477 strikingly different for the WM and Attention tasks. When participants were instructed to  
478 encode and maintain object representations, we observed a robust CDA. However, when  
479 participants were instructed to deploy covert attention to the locations of the same squares  
480 to perform a demanding target discrimination task, we saw no evidence of CDA activity.

#### 481 **Lateralized Alpha Power**

482 A broad array of studies have shown that alpha power is reduced in electrodes  
483 contralateral to attended locations (e.g. Foster, Sutterer, Serences, Vogel, & Awh, 2017;  
484 Kelly, Lalor, Reilly, & Foxe, 2006; Sauseng et al., 2005; Thut et al., 2006). In addition, the  
485 scalp topography of alpha power has been shown to track the locations of stimuli held in  
486 WM (Foster et al., 2016), even when location is not a relevant feature (Foster, Bsales, et al.,  
487 2017). Thus, a key question for the current study is whether both the WM and attention  
488 tasks elicited this signature of covert spatial orienting.

489 As Figure 4 shows, we observed the typical suppression of alpha power  
490 contralateral to the relevant hemifield in both tasks, though it was larger in the WM task.  
491 We confirmed these impressions with a repeated-measures ANOVA on the average alpha  
492 power in the same window as the CDA with the factors Laterality (contra, ipsi), Task  
493 (attention, WM) and Set Size (2, 4 items). The analysis revealed a main effect of Laterality,  
494  $F(1,47)=22.99, p<.001, \eta_p^2=.33$ , and a significant interaction of Laterality and Task,  
495  $F(1,47)=15.28, p<.001, \eta_p^2=.25$ . All other effects were not significant,  $p>=.23$ . Mean alpha  
496 lateralization was stronger in the WM ( $M=-.46, SD=.45$ ) than in the Attention ( $M=-.04,$   
497  $SD=.29$ ) condition. Nevertheless, follow-up two-way paired-samples t-tests revealed that  
498 alpha power was significantly lateralized in all conditions, WM set size 2:  $t(47)=-5.25,$   
499  $p<.001$ ; WM set size 4:  $t(47)=-4.91, p<.001$ ; Attention set size 2:  $t(47)=-3.97, p<.001$ ;  
500 Attention set size 4:  $t(47)=-3.29, p=.002$ . Thus, in both the WM and Attention conditions,  
501 we saw clear evidence of reduced alpha power in posterior contralateral electrodes,  
502 consistent with the hypothesis that both the WM and Attention tasks recruited covert  
503 spatial attention to the locations of the sample items. However, we also observed an effect  
504 of task, with more robust lateralization of alpha power in the WM task. This pattern of  
505 activity is somewhat similar to the effect of task on CDA amplitude. However, the aggregate  
506 analysis below will show that whereas CDA activity tracks set size, lateralized alpha power  
507 did not. Therefore, even though there is a main effect of task on lateralized alpha power,  
508 this signal is dissociable from the CDA. We further speculate about whether lateralized  
509 alpha power may be modulated by the requirement to form object representations in the  
510 General Discussion.



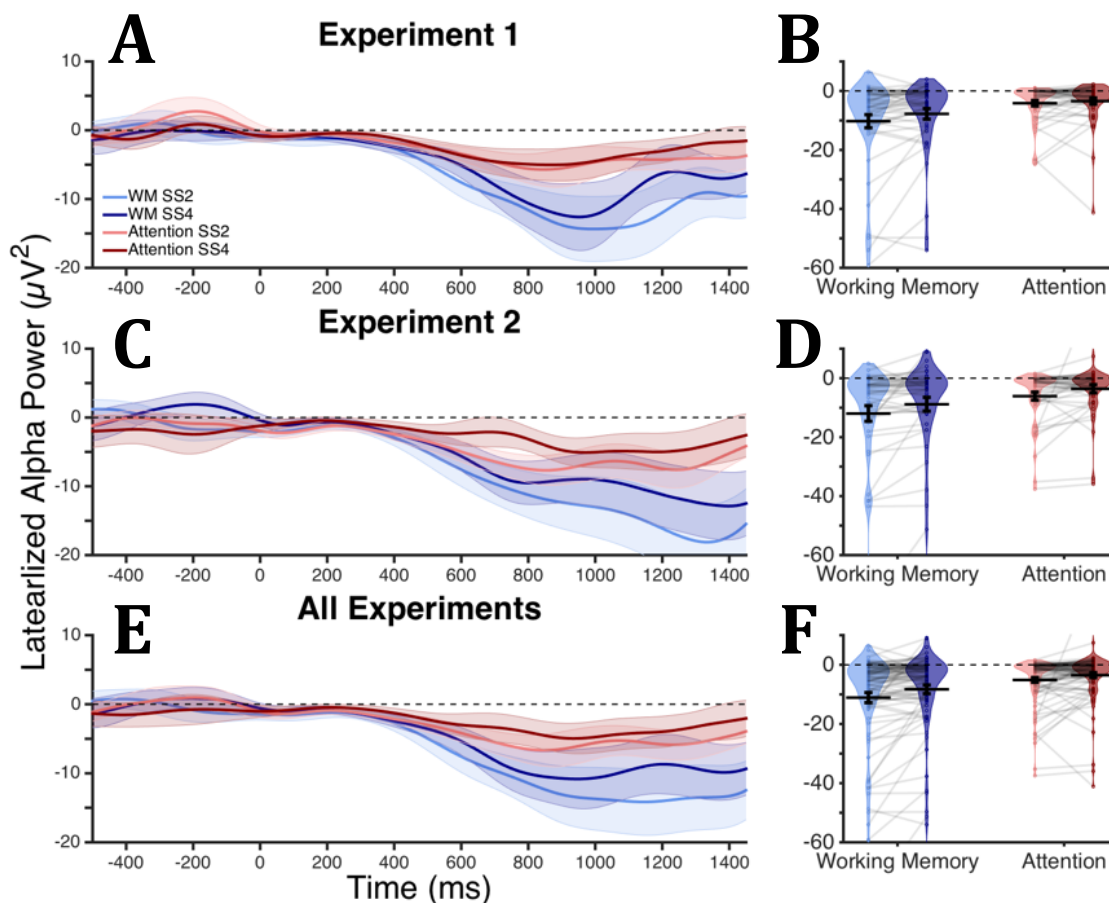

511  
512 **Figure 4.** Lateralized Alpha Power. (A) Lateralized alpha power ( $\mu V^2$ ) over time for Experiment 1. Timepoint  
513 zero marks the onset of the memory array, and timepoint 1450 marks the onset of the response array. (B)  
514 Average lateralized alpha power ( $\mu V^2$ ) for Experiment 1 during the time window of interest, 400 to 1450 ms.  
515 The distribution of lateralized alpha power for all participants is represented by the violin plot. Dots and light  
516 gray lines represent one participant's alpha power. (C, D) Lateralized alpha power for Experiment 2. (E, F)  
517 Lateralized alpha power for all experiments combined.

518  
519

### 520 Assessing Cognitive Effort with Pupil Dilation

521 The CDA analysis for Experiment 1 revealed robust CDA activity in the WM task, but  
522 no such evidence for a lateralized negativity in the Attention task. We considered whether  
523 this difference could have been a reflection of differential cognitive effort in the WM and  
524 Attention tasks. We note that subjects were well below ceiling in discriminating the  
525 orientation of the targets in the Attention task, suggesting that it was challenging.  
526 Nevertheless, it would be valuable to compare effort between the WM and Attention tasks  
527 using a common metric. Pupil dilation provides such an opportunity. When bottom-up  
528 stimulus energy is controlled, pupil dilation has been shown to be a sensitive measure of  
529 relative cognitive effort (Kahneman & Beatty, 1966). Thus, because the WM and Attention  
530 tasks employed identical stimulus displays (when rare target trials were removed from  
531 both tasks), we were able to use pupil dilation to assess relative effort in the two tasks. To  
532 compare pupil dilation (Figure 5) between the WM and Attention tasks collapsed across set  
533 size, we ran a two-way paired-samples t-test on the averaged pupil dilation from the same

534 time window as the CDA. We did this separately for each task. There was no significant  
535 difference in average pupil dilation between the WM ( $M=.65$ ,  $SD=2.00$ ) and Attention  
536 ( $M=.86$ ,  $SD=1.78$ ) tasks,  $t(43)=-.83$ ,  $p=.41$ . Thus, pupil dilation provided no indication that  
537 stronger lateralized activity in the WM task was due to increased effort. Indeed, an  
538 aggregate analysis below will provide evidence that this correlate of cognitive effort was  
539 actually higher in the Attention task.

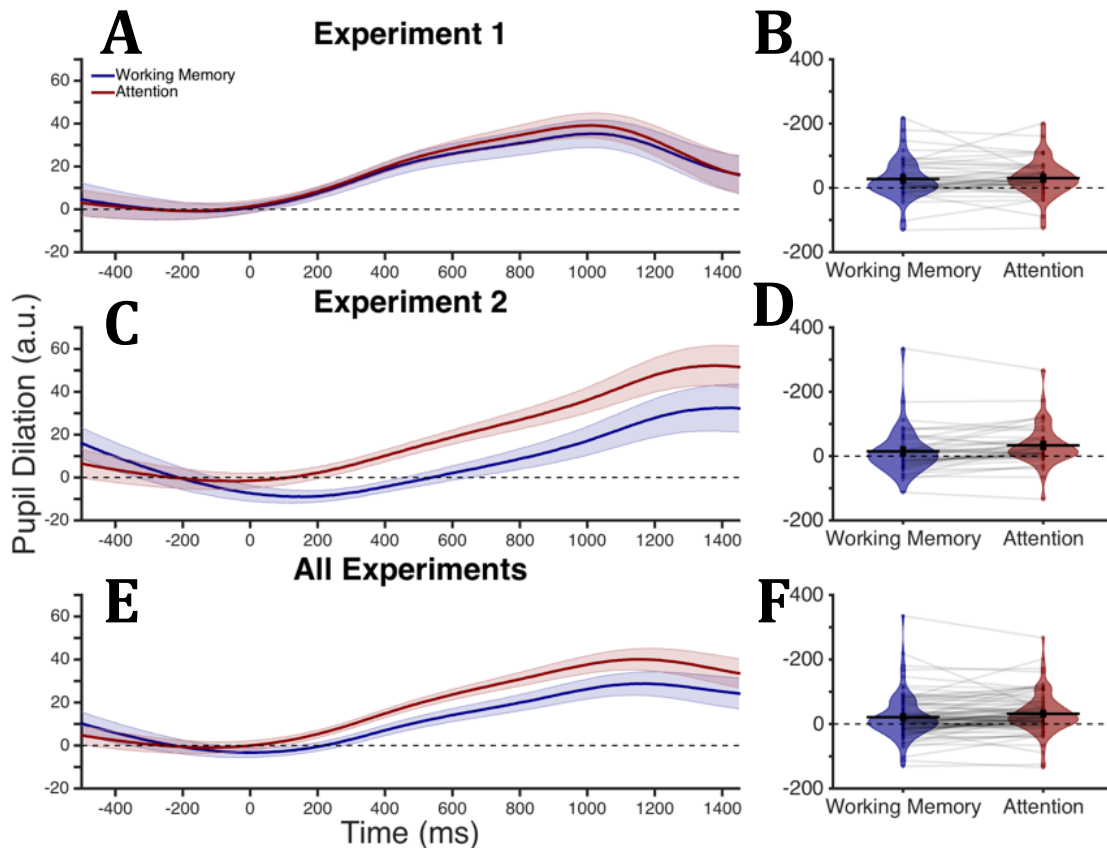

540 **Figure 5.** Task evoked pupil response. (A) Pupil dilation (arbitrary units) over time for Experiment 1.  
541 Timepoint zero marks the onset of the memory array, and timepoint 1450 marks the onset of the response  
542 array. (B) Average pupil dilation (arbitrary units) for Experiment 1 during the time window of interest, 400 to  
543 1450 ms. The distribution of pupil dilation for all participants is represented by the violin plot. Dots and light  
544 gray lines represent one participant's pupil dilation. Pupil dilation for Experiment 2 (C, D) and all  
545 experiments combined (E, F).  
546  
547

### 548 Horizontal Gaze Position

549 Because we were comparing lateralized EEG activity across tasks, it is critical to rule  
550 out eye movements as a potential source of differences between the tasks. We used high-  
551 resolution eye tracking to test for such differences. To compare horizontal gaze position  
552 between the tasks (during the same time window used to measure the CDA) we ran a 2x2  
553 repeated measures ANOVA on horizontal eye position with the factors Task (WM,  
554 Attention) and Set Size (2, 4 items). This analysis revealed that there was no main effect of  
555 Task or Set Size, and no significant interaction between these two factors,  $p>=.12$  for all  
556 effects. Thus, participants moved their eyes the same amount in all conditions. In all  
557 conditions, participants moved their eyes less than 0.017 degrees of visual angle, which is

558 smaller than the size of the fixation dot.

### 559 **Experiment 1 Summary**

560 Both the WM and Attention tasks produced reliable evidence of reduced alpha  
561 power in electrodes contralateral to the relevant hemifield, in line with a large literature  
562 showing that the topography of alpha power tracks the relevant spatial positions in WM  
563 and attention paradigms. Critically, the findings with alpha contrasted sharply with those  
564 observed with CDA activity, where lateralized activity was observed only when  
565 participants were storing object representations in WM. These findings highlight the  
566 possibility that CDA activity and alpha power play distinct functional roles in WM storage.

### 567 **Experiment 2**

#### 568 **Materials & Methods**

569 Using identical stimulus displays, Experiment 1 showed that CDA activity was  
570 strongly dependent on the voluntary storage of object information and not just the  
571 requirement to deploy covert spatial attention. When subjects stored the objects in the  
572 sample display, the lateralized CDA signal was easily observed. By contrast, the precise  
573 deployment of covert attention to the same physical displays yielded no detectable CDA  
574 activity. Although this empirical pattern is consistent with the hypothesis that CDA activity  
575 is tied to item storage *per se*, the WM and Attention tasks differed in more than one way.  
576 Specifically, the WM task required participants to remember both the *color* and the location  
577 of the sample stimuli, whereas only the location of those stimuli was relevant in the  
578 Attention task. Thus, the goal of Experiment 2 was to more precisely manipulate item  
579 storage requirements by holding constant the relevant feature in the WM and Attention  
580 tasks. To this end, the WM condition required participants to store the locations of the  
581 items in the sample display and to detect whether any item's position had changed at the  
582 end of the delay period. In the attention task, participants were instructed to maintain  
583 covert attention at the positions of the sample items to facilitate the detection and  
584 discrimination of rare line targets. Critically, while both tasks required participants to  
585 attend the location of the sample items, only the WM task encouraged subjects to store  
586 those object representations in memory. In the Attention task, by contrast, subjects  
587 attended the position of those items in anticipation of a separate target stimulus. Thus, if  
588 CDA activity is contingent on the online storage of individuated object representations,  
589 then only the WM task should elicit robust CDA activity.

#### 590 **Stimuli & Procedures**

591 We ran two versions of Experiment 2 that were almost identical except that sample  
592 stimuli were either black circles (Experiment 2a) or colored squares (Experiment 2b). In  
593 addition, there were some minor differences in stimulus sizes. These differences are  
594 described in detail below. Because preliminary analyses revealed no impact of these  
595 differences, subsequent analyses collapsed across the two versions of the procedure.

596 **Experiment 2a.** Stimuli were similar to Experiment 1b with the following  
597 exceptions. Participants were presented with 2 or 4 black circles ( $0.611^\circ$  diameter; RGB= 1  
598 1 1) in each hemifield with a minimum of  $1.53^\circ$  degrees (2.5 objects) between each item.  
599 These circles could appear within a subset of the display subtending  $2.44^\circ$  to the left  
600 or right of fixation and  $3.06^\circ$  degrees above and below fixation. On target-present trials, the  
601 two small lines that were presented briefly during the retention interval were  $0.04^\circ$  wide  
602 and  $0.76^\circ$  long.

603 **Experiment 2b.** Stimuli were similar to Experiment 2a with the following

604 exceptions. Participants were presented with 2 or 4 colored circles ( $0.84^\circ$  diameter) in each  
605 hemifield with a minimum of  $2.10^\circ$  (2.5 objects) between each item. Colors for the circles  
606 were randomly selected without replacement within each hemifield from a set of 10  
607 possible colors (Red = 255 0 0; Green = 0 255 0; Blue = 0 0 255; Yellow = 255 255 0;  
608 Magenta = 255 0 255; Cyan = 0 255 255; Orange = 255 128 0; Brown = 102 51 0; White =  
609 255 255 255; Black = 1 1 1). On target-present trials, the two small lines that were  
610 presented briefly during the retention interval were  $0.04^\circ$  wide and  $0.99^\circ$  long.

611 Just as in Experiment 1, participants in both Experiment 2a and 2b completed both  
612 an attention task and a WM task. The timing of trial events was identical to Experiment 1b.  
613 The key difference between Experiment 1 and 2 is that participants completed a spatial  
614 change detection task rather than a color change detection task.

615 **Working Memory Task.** Procedures for the WM task were very similar to the  
616 procedure from Experiment 1, except that participants were asked to identify whether the  
617 location of the presented circle in the attended hemifield was in the same or different  
618 location as the any of the original circles.

619 **Attention Task.** Procedures and instructions for the attention task were identical to  
620 Experiment 1b. Only the visual stimuli differed, so as to match the visual stimuli presented  
621 in the WM task.

## 622 Results

### 623 Rationale for Collapsing Experiment 2a and 2b

624 In a preliminary analysis, we examined whether the small variations in task design  
625 between Experiments 2a and 2b had an effect on the observed results. For this purpose, we  
626 ran repeated-measures ANOVAs for each analysis (e.g. Behavior, CDA, etc.) with the within-  
627 subjects factors Task (WM, Attention) and Set Size (2, 4 items) and the between-subjects  
628 factor Experiment (2a, 2b). There was no main effect of Experiment for any of the analyses,  
629  $p \geq .10$ , and no interaction of Experiment with any other factor ( $p > .10$ ). Therefore,  
630 subsequent analyses collapsed the data across 2a and 2b.

### 631 Behavior

632 As we did for Experiment 1, we separately analyzed performance for the WM and  
633 attention tasks. For the WM task, there was a significant difference in K score between Set  
634 Size 2 and 4,  $t(48) = -4.1$ ,  $p < .001$ . Participants remembered significantly more items on set  
635 size 4 ( $M = 1.43$ ,  $SD = .69$ ) than set size 2 trials ( $M = 1.23$ ,  $SD = .49$ ).

636 In the Attention task, participants had a high rate of detecting whether a line was  
637 present (Set Size 2:  $M = .97$ ,  $SD = .02$ ; Set Size 4:  $M = .96$ ,  $SD = .02$ ). To compare performance  
638 between set size 2 and 4 when participants had to discriminate the orientation of the target  
639 line, we used a two-tailed, paired-samples t-test. Participants correctly reported the  
640 orientation of the target line more frequently on Set Size 2 ( $M = .75$ ,  $SD = .10$ ) than on Set Size  
641 4 ( $M = .69$ ,  $SD = .11$ ) trials,  $t(48) = 4.00$ ,  $p < .001$ . Thus, monitoring four locations was more  
642 difficult than monitoring two locations.

### 643 Contralateral Delay Activity

644 As shown in Figure 3, CDA activity was different across the WM and Attention tasks,  
645 with more robust lateralized activity and effects of set size in the WM task. This impression  
646 was confirmed with a repeated-measure ANOVA with the factors Task (WM, Attention),  
647 Laterality (contra, ipsi) and Set Size (2, 4 items). The repeated measures ANOVA revealed  
648 significant main effects of Laterality,  $F(1,48) = 39.38$ ,  $p < .001$ ,  $\eta^2 = .45$ , and Set Size,  
649  $F(1,48) = 21.03$ ,  $p < .001$ ,  $\eta^2 = .31$ . Critically, there was a reliable interaction between



650 Laterality and Task  $F(1,48)=23.68, p<.001, \eta_p^2 =.33$ , showing that CDA activity differed  
651 between the WM and Attention tasks. There were also significant interactions between  
652 Task and Set Size,  $F(1,48)=5.72, p=.02, \eta_p^2 =.11$ , and between Laterality and Set Size  
653  $F(1,48)=16.88, p<.001, \eta_p^2 =.26$ ; because these interactions refer to data collapsed across  
654 Laterality or Task, they are not informative regarding the central question of which task  
655 requirements generate CDA activity. Finally, given our hypothesis that CDA activity may be  
656 specifically tied to the formation of object representations, we also predicted a triple  
657 interaction between Laterality, Task and Set Size, because load-dependent CDA activity  
658 should be more pronounced in the WM task. This interaction was trending but did not  
659 reach conventional thresholds for significance,  $F(1,48)=3.72, p=.06, \eta_p^2 =.07$ . We re-visit  
660 this question below with a more sensitive aggregate analysis of Experiments 1 and 2  
661 together.

662 To further delineate the key interaction between Laterality and Task, we ran a  
663 follow-up paired-samples t-tests, collapsed across set size. Examining the difference  
664 between contralateral and ipsilateral activity in each task, we observed reliable effects of  
665 Laterality for both the WM and Attention tasks,  $p<=.03$  for all conditions. Critically,  
666 however, the effect of Laterality was substantially larger in the WM task, ( $M=-.49, SD=.50$ )  
667 than in the Attention task ( $M=-.17, SD=.35$ ),  $t(48)=-4.88, p<.001$ . Thus, Experiment 2  
668 replicated the broad empirical pattern in Experiment 1; CDA activity was far stronger when  
669 participants were instructed to store object representations in WM than when they were  
670 instructed to attend those locations in anticipation of upcoming targets.

671 The marked difference in CDA activity between the WM and Attention tasks is  
672 particularly striking in light of their strong similarity. Indeed, while the labels for the WM  
673 and Attention tasks highlight their respective storage and selection requirements, both  
674 tasks actually require the sustained maintenance of spatial information. In the WM task,  
675 participants held the positions of the sample items in mind to facilitate change detection,  
676 while in the Attention task, participants held a sustained focus of spatial attention at  
677 specific positions. Nevertheless, CDA activity was more than twice as high in the WM task,  
678 motivating the conclusion that CDA activity is tied to object representations held in WM *per*  
679 *se*, and not simply the deployment of covert attention – even when an attention task  
680 requires the maintenance of spatial information. If this is correct, however, it raises the  
681 question of why we saw reliable CDA activity in the Attention task. Our working hypothesis  
682 is that this modest effect of Laterality could reflect the occasional storage of object  
683 representations during the Attention task, but the current study does not provide a clear  
684 way to test this possibility. Nevertheless, while this question can't be fully answered,  
685 Experiment 2 did replicate the striking divergence in CDA activity between the WM and  
686 Attention tasks, in line with the hypothesis that this neural signal may be specifically tied to  
687 item storage in visual WM.

### 688 **Lateralized Alpha Power**

689 Just as in Experiment 1, we observed the typical suppression of alpha power  
690 contralateral to the relevant hemifield in both tasks. Once again, this effect was larger in the  
691 WM task. We confirmed these impressions with a repeated-measures ANOVA on average  
692 alpha power with the factors Laterality (contra, ipsi), Task (attention, WM) and Set Size (2,  
693 4 items). The analysis revealed a significant main effect of Laterality,  $F(1,48)=24.17,$   
694  $p<.001, \eta_p^2 =.34$ , and a significant interaction between Laterality and Task,  $F(1,48)=13.38,$   
695  $p<.001, \eta_p^2 =.22$ . Follow-up two-way paired samples t-tests on the difference between



696 contralateral and ipsilateral activity for each condition revealed significant alpha power  
697 suppression in all conditions,  $p \leq .001$  for both set sizes in both the WM and Attention  
698 tasks. No other effects were significant,  $p > .10$ .

699 To characterize the interaction of Laterality and Task, we collapsed Laterality into a  
700 difference wave (contra minus ipsi). We then compared this difference wave for the  
701 Attention and WM conditions, averaged across Set Size, with a two-way paired samples t-  
702 test. This analysis revealed a significant difference in alpha power lateralization between  
703 the WM and Attention tasks,  $t(48) = -3.66$ ,  $p = .001$ . Alpha power was more suppressed in  
704 contralateral relative to ipsilateral electrodes during the WM ( $M = -9.16$ ,  $SD = 13.38$ ) than  
705 during the Attention ( $M = -4.01$ ,  $SD = 6.73$ ) task.

706 To summarize, in both tasks, we found clear evidence of sustained covert orienting  
707 towards the relevant hemifield. This makes the important point that the lack of a robust  
708 CDA in the Attention task is not due to a failure to maintain attention towards the relevant  
709 hemifield. In addition, replicating the finding from Experiment 1, we observed reliably  
710 stronger lateralization of alpha power when participants were instructed to store the  
711 sample items in WM. Thus, both neural signals suggest a distinction between the  
712 maintenance of items in working memory, and the maintenance of spatial attention at the  
713 position of those items.

#### 714 **Horizontal Gaze Position**

715 To determine whether horizontal gaze position varied across tasks, we ran a 2x2  
716 repeated-measures ANOVA with the factors Task (WM, Attention) and Set Size (2, 4 items).  
717 This analysis revealed a significant main effect of Task,  $F(1,42) = 4.78$ ,  $p = .03$ ,  $\eta_p^2 = .10$ .  
718 Participants moved their eyes more during the WM ( $M = .03$ ,  $SD = .03$ ) than the Attention  
719 ( $M = .02$ ,  $SD = .02$ ) task. We would like to point out that the difference in eye movements  
720 between these two tasks is only about .01 degrees, which is smaller than the diameter of  
721 the fixation point. Nevertheless, to determine whether these differences in horizontal gaze  
722 position drive the differences in the CDA that we observe, we compared horizontal gaze  
723 position during the time window when the CDA initially emerges, 400 to 925 ms after  
724 stimulus onset. The 2x2 repeated measures ANOVA with factors Task (WM, Attention) and  
725 Set Size (2, 4 items) for the average horizontal gaze position during this time window  
726 revealed that there was no significant main effect of Task or Set Size and no interaction of  
727 these two factors,  $p > .06$  for all effects. This indicates that during the time window when  
728 the CDA is ramping up, participants moved their eyes the same amount in all conditions.  
729 Therefore, any differences in the CDA that we observe are not driven by differences in  
730 horizontal eye movements. As a follow-up analysis we also analyzed horizontal eye  
731 movement averaged over the end of the trial, 926 to 1450 ms, with another 2x2 ANOVA  
732 with factors Task (WM, Attention) and Set Size (2, 4 items). This analysis revealed that  
733 differences in horizontal eye movements between the WM and Attention tasks emerged  
734 toward the end of the trial, significant main effect of Task,  $F(1,43) = 4.40$ ,  $p = .04$ ,  $\eta_p^2 = .09$ . All  
735 other effects and interactions were not significant,  $p > .06$ .

#### 736 **Pupil Dilation**

737 As with Experiment 1, to compare the task-evoked pupil response between the WM  
738 and Attention tasks collapsed across set size, we ran a two-way paired-samples t-test. This  
739 analysis revealed greater task-evoked pupil dilation in the Attention task ( $M = .60$ ,  $SD = .29$ )  
740 than in the WM task ( $M = -.07$ ,  $SD = 2.36$ ),  $t(43) = -3.65$ ,  $p = .001$ , suggesting that the Attention  
741 task elicited greater cognitive effort. Therefore, the robust CDA in the WM condition is

742 unlikely to reflect greater cognitive effort in the WM than the Attention task.

### 743 **Aggregate analysis of Experiments 1 and 2**

744 In the analysis reported below, we aggregated data across Experiments 1 and 2 to  
745 provide the most power for understanding the distinctions between the WM and Attention  
746 tasks. This analysis included 97 participants, and clearly reinforces the robustness of the  
747 key empirical patterns. In this aggregate analysis, we focus on CDA, alpha power, and pupil  
748 size because aggregate analyses of behavior and eye position were not central to our  
749 primary arguments and merely echoed all the main effects and interactions that were  
750 observed in the individual experiments.

### 751 **Preliminary analysis of the effect of Experiment**

752 In a preliminary analysis, we examined whether the small variations in task design  
753 between Experiments 1 and 2 had an effect on the observed results. For this purpose, we  
754 ran repeated-measures ANOVAs for each analysis (i.e., CDA, alpha power, and pupil size)  
755 with the within-subjects factors Task (WM, Attention) and Set Size (2, 4 items) and the  
756 between-subjects factor Experiment (1, 2). For all analyses, there was no main effect of  
757 Experiment,  $p \geq .16$ . Therefore, it was justified to collapse data across the two experiments.

758 For the horizontal gaze position and the lateralized alpha analyses, none of the  
759 factors significantly interacted with Experiment,  $p \geq .19$ . However, for the pupil dilation  
760 analysis, there was a significant interaction of Task and Experiment,  $F(1,86)=10.76$ ,  $p=.002$ ,  
761  $\eta^2 = .11$ . This significant interaction is explained by greater pupil dilation in the Attention  
762 task than in the WM task in Experiment 2, but not in Experiment 1.

763 For the CDA analysis, there was a significant 3-way interaction of Laterality, Set Size,  
764 and Experiment,  $F(1,95)=6.73$ ,  $p=.01$ ,  $\eta^2 = .07$ . To further delineate this three-way  
765 interaction, we ran follow-up ANOVAs with the factors Laterality (contra, ipsi) and Set Size  
766 (2, 4 items) for Experiment 1 and Experiment 2 separately. These follow-up analyses  
767 revealed that there was a significant interaction of Laterality and Set Size for Experiment 2,  
768  $F(1,48)=16.88$ ,  $p<.001$ ,  $\eta^2 = .26$ , but not for Experiment 1,  $F(1,47)=.08$ ,  $p=.78$ ,  $\eta^2 = .002$ .

### 769 **Contralateral Delay Activity**

770 Using all data from Experiments 1 and 2 together, we ran a repeated-measures  
771 ANOVA with the factors Task (WM, Attention) and Set Size (2, 4 items). This analysis  
772 revealed significant main effects of Laterality,  $F(1,96)=74.41$ ,  $p<.001$ ,  $\eta^2 = .44$ , and Set Size,  
773  $F(1,96)=33.27$ ,  $p<.001$ ,  $\eta^2 = .26$ . Because these main effects were collapsed across Task,  
774 they are not informative for our central question of how storage-related neural signals  
775 differ across tasks. Thus, the first important finding was a significant 2-way interaction  
776 between Laterality and Task,  $F(1,96)=81.27$ ,  $p<.001$ ,  $\eta^2 = .46$  that reflected a greater  
777 laterality effect in the WM than in the Attention task. To confirm this impression, we ran a  
778 follow-up 2-way paired-samples t-test that compared contralateral to ipsilateral activity  
779 separately for the WM and Attention and each set size (e.g. WM ss2, WM ss4, ATT ss2, ATT  
780 ss4). This analysis revealed that the CDA was significantly more lateralized in the WM (Set  
781 Size 2:  $M = -.38$ ,  $SD = .44$ ; Set Size 4:  $M = -.54$ ,  $SD = .54$ ) than in the Attention (Set Size 2:  $M = -.09$ ,  
782  $SD = .34$ ; Set Size 4:  $M = -.10$ ,  $SD = .37$ ) task for both set sizes (Set Size 2:  $t(98) = -6.71$ ,  $p < .001$ ; Set  
783 Size 4:  $t(98) = -8.57$ ,  $p < .001$ ). We note, however, that there was reliable lateralized activity for  
784 both tasks,  $p \leq .007$ .

785 The most important opportunity afforded by this aggregate analysis of CDA activity  
786 was that we now had sufficient power to examine whether increased mnemonic load had a  
787 differential effect on CDA activity in the WM and Attention task. Indeed, there was a reliable

788 triple interaction between Task, Laterality and Set Size  $F(1,96)=8.75, p=.004, \eta_p^2=.08$ . As  
789 Figure 3 shows, CDA activity was set size dependent in the WM task, but not in the  
790 Attention task. To verify this impression, we ran separate follow-up repeated-measures  
791 ANOVAs for each task (WM and Attention) with the factors Laterality (contra, ipsi) and Set  
792 Size (2, 4 items). This analysis revealed that there was a significant interaction of Laterality  
793 and Set Size for the WM task,  $F(1,96)=14.39, p<.001, \eta_p^2=.13$ , but not the Attention task,  
794  $F(1,96)=.07, p=.79, \eta_p^2=.001$ . Thus, while data from the WM task showed that CDA  
795 amplitude was larger for set size 4 ( $M=-.55, SD=.54$ ) than set size 2 ( $M=-.39, SD=.44$ ), data  
796 from the Attention task showed no evidence of a difference in CDA amplitude between Set  
797 Size 2 ( $M=-.10, SD=.34$ ) and Set Size 4 ( $M=-.11, SD=.37$ ).

798 To summarize, the aggregate analysis confirmed that CDA activity was substantially  
799 stronger in the WM than in the Attention task. Moreover, this analysis had sufficient power  
800 to show that CDA activity tracked the increase in mnemonic load from two to four items,  
801 while the CDA signal in the Attention task – in addition to being over four times smaller  
802 than in the WM task – showed no effect of mnemonic load at all, a defining feature of the  
803 CDA. This core result motivates our conclusion that CDA activity is directly linked with the  
804 online maintenance of object representations in WM, and not the deployment of attention  
805 to the positions of the sample items.

### 806 **Lateralized Alpha Power**

807 The aggregate analysis of Experiments 1 and 2 confirmed the results of the  
808 individual experiments. As Figure 4 shows, we observed the typical suppression of alpha  
809 power contralateral to the relevant hemifield in both tasks, though it was larger in the WM  
810 task. Just as with the individual experiments, we confirmed these impressions with a  
811 repeated-measures ANOVA on the average alpha power with the factors Laterality (contra,  
812 ipsi), Task (attention, WM) and Set Size (2, 4 items). This analysis revealed a significant  
813 main effect of Laterality,  $F(1,96)=45.57, p<.001, \eta_p^2=.32$ , and a significant interaction  
814 between Laterality and Set Size,  $F(1,96)=9.75, p=.002, \eta_p^2=.09$ . Paired t-tests confirmed  
815 that this interaction reflects a stronger lateralization of alpha power in the set size 2  
816 condition ( $M=-12.24, SD=17.17$ ) than in the set size 4 condition ( $M=-10.04, SD=16.06$ )  
817 ( $t(96)=-3.123, p=.002$ ). Thus, the strength of lateralized alpha activity varied with the  
818 number of stored or attended positions in both the WM and Attention tasks. Critically,  
819 however, the effect of set size on lateralized alpha power was in the opposite direction  
820 from the effect we observed with CDA activity. CDA activity was stronger for set size 4 than  
821 for set size 2 whereas alpha lateralization was stronger for set size 2 than for set size 4.  
822 These findings support the hypothesis that CDA and alpha activity reflect distinct aspects of  
823 online storage in visual WM.

824 The aggregate analysis also revealed a significant interaction between Laterality and  
825 Task,  $F(1,96)=27.22, p<.001, \eta_p^2=.22$ , that reflected the greater lateralization of alpha  
826 power in the WM than in the Attention task. This impression was confirmed with a two-  
827 way paired samples t-test that revealed a significant difference in alpha power  
828 lateralization between the WM ( $M=-7.79, SD=11.61$ ) and Attention ( $M=-3.35, SD=5.69$ )  
829 tasks,  $t(96)=-5.22, p<.001$ . Critically, both tasks showed clear evidence of lateralized alpha  
830 power in both set sizes ( $p<.001$  for all conditions), confirming that covert attention was  
831 deployed to the position of sample items in a sustained fashion in both tasks. The greater  
832 lateralization of alpha power in the WM than Attention task is a robust empirical pattern  
833 that is present in both experiments and in the aggregate analysis. Though we did not expect

834 this pattern *a priori*, this reliable difference in alpha lateralization between the two tasks  
835 may reflect a direct influence of online object representations on the deployment of spatial  
836 attention.

### 837 **Pupil Dilation**

838 We argue that the WM task encouraged online storage of object representations  
839 while the Attention task did not. Thus, the restriction of load-dependent CDA activity to the  
840 WM task could reflect a direct link between the CDA and item storage in WM. A clear  
841 alternative hypothesis, however, is that the WM task may differ from the Attention task in  
842 terms of the intensity or effort applied to the task rather than the specific cognitive  
843 operations that were invoked. While accuracy was similar (and off of ceiling) in the two  
844 tasks, this does not provide strong evidence for equivalent effort. Fortunately, pupil  
845 dilation measurements have been shown to provide a sensitive index of cognitive effort  
846 and arousal when bottom-up stimulus factors are controlled. Thus, we ran a two-way  
847 paired-samples t-test to examine whether pupil size differed during the time window in  
848 which CDA activity was measured. This analysis revealed a greater level of pupil dilation in  
849 the Attention task ( $M = .63$ ,  $SD = 1.89$ ) compared to the WM task ( $M = .29$ ,  $SD = 2.20$ ),  $t(87) = -$   
850  $3.13$ ,  $p = .002$ , suggesting that the Attention task recruited greater levels of cognitive effort.  
851 Thus, our finding that CDA activity was far larger in the WM task cannot be explained by  
852 increased effort in the WM task. Indeed, pupil analysis of the aggregated data suggests that  
853 the WM task was the easier of the two. These findings argue for a difference in the nature of  
854 the cognitive operations evoked by the WM and Attention tasks, rather than in the degree  
855 to which similar operations were carried out.

### 856 **Aggregate Analysis Summary**

857 With 97 subjects, this aggregate analysis reinforced the key conclusions of  
858 Experiments 1 and 2, and provided strong statistical power for documenting how neural  
859 activity differed between the WM and Attention tasks. CDA activity was more than four  
860 times larger in the WM task than in the Attention task. Moreover, CDA activity in the WM  
861 task clearly tracked changes in mnemonic load whereas CDA activity in the Attention task  
862 showed no evidence of load sensitivity. Thus, given that these tasks employed identical  
863 stimulus displays, we conclude that CDA activity may be directly tied to the unique *object*  
864 *representation* requirements in the WM task and not covert attentional orienting to the  
865 sample array positions.

866 The WM and Attention tasks differ in terms of object storage, but past work suggests  
867 that both WM and attention tasks may call upon a common spatial attention process that  
868 elicits orderly changes in the scalp topography of alpha power. In addition to past studies  
869 showing the broad involvement of alpha activity across a wide range of attention and  
870 memory paradigms (Canolty & Knight, 2010; Fries, 2005; Klimesch, 2012), more recent  
871 work has also established that the topography of alpha activity on the scalp can be used to  
872 precisely track the locus of covert attention (Foster, Sutterer, et al., 2017; Rihs, Michel, &  
873 Thut, 2007) and locations stored in WM (Foster, Bsales, et al., 2017; Foster et al., 2016). In  
874 line with this work, there was clear evidence from both the WM and Attention tasks that  
875 alpha power in posterior electrodes was reduced contralateral to the sample array.  
876 Importantly, the aggregate analysis also had enough power to reveal a reliable effect of set  
877 size on the strength of alpha lateralization, such that greater lateralization was observed in  
878 the set size 2 condition compared to the set size 4 condition. This effect may not generalize,  
879 however, as some previous research has not found an effect of set size on lateralization



880 (Fukuda, Mance, & Vogel, 2015), while others have found greater lateralization for larger  
881 set sizes (Sauseng et al., 2009). Nevertheless, the fact that CDA activity showed the opposite  
882 pattern, with higher CDA activity for the larger set size, highlights the possibility that these  
883 two neural signals (measured from within the same set of electrodes) index distinct aspects  
884 of maintenance within the focus of attention.

885 Finally, we examined whether these differences in neural activity were a  
886 consequence of differential effort or arousal in the two tasks. Because the stimulus displays  
887 were identical, we were able to use task-evoked pupil dilation to obtain a sensitive metric  
888 of cognitive effort and arousal. The aggregate analysis revealed that the Attention task  
889 elicited reliably larger pupil size than the WM task, suggesting that the Attention task  
890 elicited greater effort. In line with this conclusion, we also note that while behavioral data  
891 from the Attention task showed that monitoring four locations was more difficult than  
892 monitoring two locations, CDA activity in the Attention task was unaffected by set size.  
893 Together, these findings argue strongly against the hypothesis that stronger delay period  
894 signals in the WM task were a consequence of greater cognitive effort.

### 895 Discussion

896 The focus of attention refers to the small set of mental representations that can be  
897 held in an *online* or readily accessible state. Motivated by its central role in intelligent  
898 behaviors, there has been a longstanding effort to elucidate the neural signals that track the  
899 contents of this internally attended information. This body of work has tended to treat the  
900 focus as a monolithic entity, but here we extend the growing evidence that the focus of  
901 attention may be implemented via multiple component processes playing distinct  
902 functional roles: one that represents currently prioritized space ( $\alpha$ ); and another that  
903 reflects item storage within the focus of attention (CDA). This proposal converges with  
904 other findings that suggest a dissociation between spatial attention and WM storage (Tas et  
905 al., 2016; Sheremata et al 2018)

### 906 CDA activity and lateralized alpha power: Distinct components of the focus of 907 attention

908 van Dijk et al. (2010) proposed that asymmetric modulations of alpha power at the  
909 trial-level can generate a CDA-like negative slow wave in an event-related average.  
910 However, there is growing evidence that these two measures can be clearly dissociated. For  
911 example, Fukuda et al. (2016) used a lateralized change detection task where they cued  
912 participants to one side of the screen, but had a longer than normal (1,000 ms) SOA  
913 between the cue and the memory array. During this blank cue period, participants knew  
914 which hemifield would contain memory items, but no items had yet appeared. During this  
915 time, there was robust alpha power lateralization but no CDA. However, after the memory  
916 array appeared, the CDA and alpha power lateralization appeared in concert during the  
917 memory maintenance period (1,000 ms). These results suggest lateralized alpha power,  
918 and thus attention, can be shifted to empty space, but that the CDA necessitates object  
919 storage (see also Fukuda, Mance & Vogel, 2015).

### 920 CDA activity as an index of item-based storage in working memory

921 What was the critical difference between the WM and Attention tasks? Despite the  
922 fact that they employed identical stimulus displays, the amplitude of the CDA was more  
923 than four times larger in the WM than in the Attention task, and only the WM task elicited  
924 load-dependent CDA activity. Both tasks elicited covert orienting to the positions of the  
925 items in the sample array, as shown by sustained lateralized alpha power modulations.



926 Moreover, despite distinct monikers, *both* tasks required the sustained maintenance of  
927 spatial information across a blank delay. This storage requirement is obvious for the WM  
928 change detection task. But even for the Attention task, subjects must have maintained the  
929 cued positions so that they could be distinguished from lures. Indeed, in Experiment 2,  
930 change detection in the WM task required precisely the same spatial discriminations as did  
931 target identification in the Attention task. Thus, we propose that the critical difference  
932 between the WM and Attention tasks was that the WM task encouraged the continued  
933 *representation of the items* in the sample array, while in the Attention task participants  
934 directed spatial attention to those positions without maintaining the items themselves.

### 935 **CDA activity as a neural index of object file maintenance**

936 Our interpretation of the CDA as an index of continued representations of object  
937 files critically hinges on a distinction between the maintenance of items in working  
938 memory and the maintenance of spatial information without an accompanying item  
939 representation. While some may view this as provocative, recent work has shown  
940 dissociable patterns of activity in parietal lobe between WM and spatial attention demands  
941 (Sheremata, Somers, & Shomstein, 2018). Additionally, we note that there is a longstanding  
942 precedent for a distinction between the representation of an object and the representation  
943 of the features or identifying labels associated with that object. Kahneman, Treisman, &  
944 Gibbs (1992) elucidated this idea with the *object file* construct which proposes two  
945 separable stages of processing. The first involves the parsing of the scene into a set of  
946 individuated items that are indexed based on their spatial and temporal coordinates.  
947 Subsequently, the specific feature values (e.g., color and orientation) are processed and  
948 incorporated into the associated object file. Thus, object files anchor the episodic  
949 representation in a specific time and place, and are distinct from the specific feature values  
950 that are bound together by virtue of an object file. In the present context, an intriguing  
951 possibility is that CDA activity indexes the maintenance of object files in WM. This proposal  
952 is consistent with recent work showing that the CDA is sensitive to objecthood cues  
953 (Balaban & Luria, 2016) and tracks the number of encoded objects, not the number of  
954 features within objects (Luria & Vogel, 2011). Thus, even though the Attention task  
955 required the sustained maintenance of location information, CDA activity was minimal or  
956 absent (and insensitive to mnemonic load) because the task did not encourage the  
957 maintenance of the object files that were created during the encoding of the sample array.

### 958 **Open question on the impact of “object files” on the allocation of spatial attention**

959 In this series of experiments, lateralized alpha power was a useful tool to illustrate  
960 that participants sustained their attention to the cued side even when the CDA was  
961 completely absent (Exp 1). However, we also observed a main effect of our task  
962 manipulation on lateralized alpha power. When task demands required participants to  
963 encode object representations, alpha power was significantly more lateralized than when  
964 they only had to sustain their attention to empty space. Though we did not predict this  
965 pattern *a priori*, it was reliable in both experiments. This suggests that, like the CDA,  
966 lateralized alpha power respects the dissociation between forming object representations  
967 and maintaining a spatial priority map. One possible interpretation of this effect is that  
968 object representations serve as “anchors” for the allocation of spatial attention, thus  
969 amplifying the effects of attention and leading to increased alpha power lateralization.  
970 While future work is needed to investigate the complex interrelationship between  
971 lateralized alpha power and task demands, the present work clearly suggests that

972 lateralized alpha power does not directly generate, and is dissociable from, the CDA.

973 **Conclusions**

974 A growing body of evidence has shown that CDA activity and alpha power are tightly  
975 linked with the maintenance of information in the focus of attention. Here, we present new  
976 evidence that these two neural signals represent distinct facets of this online system. A  
977 topographic distribution of alpha power indexes the current locus of spatial attention, a  
978 process that is integral to both visual selection and the voluntary storage of items in WM.  
979 By contrast, CDA activity tracks the active maintenance of object files, the item-based  
980 representations that allow observers to integrate the ensemble of features and labels that  
981 are associated with visual objects. The dissociable activity of the CDA and alpha power  
982 suggests that the focus of attention is composed of at least two distinct but complementary  
983 neural processes, a conclusion with strong implications for both cognitive and neural  
984 models of this online storage system.

985

986

987

988

989

990

991

992

993

994

995

996

997

998

999

1000

1001

1002

1003

1004

1005

1006

1007

1008

1009

1010

1011

1012

1013

1014

1015

1016

1017

## References

- 1018  
1019  
1020 Balaban, H., & Luria, R. (2016). Integration of Distinct Objects in Visual Working Memory  
1021 Depends on Strong Objecthood Cues Even for Different-Dimension Conjunctions.  
1022 *Cerebral Cortex*, 26(5), 2093–2104.  
1023 Balaban, H., & Luria, R. (2017). Neural and Behavioral Evidence for an Online Resetting  
1024 Process in Visual Working Memory. *The Journal of Neuroscience*, 37(5), 1225–1239.  
1025 Beatty, J. (1982). Task-Evoked Pupillary Responses, Processing Load, and the Structure of  
1026 Processing Resources, 91(2), 276–292.  
1027 Berggren, N., & Eimer, M. (2016). Does Contralateral Delay Activity Reflect Working  
1028 Memory Storage or the Current Focus of Spatial Attention within Visual Working  
1029 Memory? *Journal of Cognitive Neuroscience*, 28(12).  
1030 Buschman, T. J., Siegel, M., Roy, J. E., & Miller, E. K. (2011). Neural substrates of cognitive  
1031 capacity limitations. *Proceedings of the National Academy of Sciences*, 108(27), 1–4.  
1032 Canolty, R. T., & Knight, R. T. (2010). The functional role of cross-frequency coupling.  
1033 *Trends in Cognitive Sciences*, 14(11), 506–515.  
1034 Cornelissen, F. W., Peters, E. M., & Palmer, J. (2002). The Eyelink Toolbox: Eye tracking with  
1035 MATLAB and the Psychophysics Toolbox. *Behavior Research Methods, Instruments, and*  
1036 *Computers*, 34(4), 613–617.  
1037 Cowan, N. (1999). *An embedded-process model of working memory*.  
1038 Cowan, N. (2001). The magical number 4 in short term memory. A reconsideration of  
1039 storage capacity. *Behavioral and Brain Sciences*, 24(4), 87–186.  
1040 Curtis, C. E., & D'Esposito, M. (2003). Persistent activity in the prefrontal cortex during  
1041 working memory. *Trends Cogn. Sci.*, 7, 415–423.  
1042 Feldmann-Wüstefeld, T., & Vogel, E. K. (2018). Neural Evidence for the Contribution of  
1043 Active Suppression During Working Memory Filtering. *Cerebral Cortex*.  
1044 Foster, J. J., Bsaies, E. M., Jaffe, R. J., & Awh, E. (2017). Alpha-Band Activity Reveals  
1045 Spontaneous Representations of Spatial Position in Visual Working Memory. *Current*  
1046 *Biology*, 27(20), 3216–3223.e6.  
1047 Foster, J. J., Sutterer, D. W., Serences, J. T., & Awh, E. (2016). The topography of alpha-band  
1048 activity tracks the content of spatial working memory. *Journal of Neurophysiology*,  
1049 115(1), 168–77.  
1050 Foster, J. J., Sutterer, D. W., Serences, J. T., Vogel, E. K., & Awh, E. (2017). Alpha-Band  
1051 Oscillations Enable Spatially and Temporally Resolved Tracking of Covert Spatial  
1052 Attention. *Psychological Science*, 28(7), 929–941.  
1053 Fries, P. (2005). A mechanism for cognitive dynamics: Neuronal communication through  
1054 neuronal coherence. *Trends in Cognitive Sciences*, 9(10), 474–480.  
1055 Fukuda, K., Mance, I., & Vogel, E. K. (2015). Alpha Power Modulation and Event-Related  
1056 Slow Wave Provide Dissociable Correlates of Visual Working Memory. *Journal of*  
1057 *Neuroscience*, 35(41), 14009–14016.  
1058 Funahashi, S., Chafee, M. V., & Goldman-Rakic, P. S. (1993). Prefrontal neuronal activity in  
1059 rhesus monkeys performing a delayed anti-saccade task. *Nature*, 365(6448), 753–756.  
1060 Jonides, J., Lacey, S. C., & Nee, D. E. (2015). Processes of Working Memory in Mind and  
1061 Brain. *Society*, 14(1), 12–15.  
1062 Kahneman, D., & Beatty, J. (1966). Pupil Diameter and Load on Memory. *Science*.  
1063 Kahneman, D., Treisman, A., & Gibbs, B. J. (1992). The reviewing of object files: Object-

- 1064 specific integration of information. *Cognitive Psychology*, 24(2), 175–219.
- 1065 Kelly, S. P., Lalor, E., Reilly, R., & Foxe, J. J. (2006). Increases in Alpha Oscillatory Power  
1066 Reflect an Active Retinotopic Mechanism for Distracter Suppression During Sustained  
1067 Visuospatial Attention. *Journal of Neurophysiology*, 95(6), 3844–3851.
- 1068 Klimesch, W. (2012). Alpha-band oscillations, attention, and controlled access to stored  
1069 information. *Trends in Cognitive Sciences*, 16(12), 606–617.
- 1070 Lewis-Peacock, J. A., Drysdale, A. T., Oberauer, K., & Postle, B. R. (2012). Neural Evidence for  
1071 a Distinction between Short-term Memory and the Focus of Attention. *Journal of*  
1072 *Cognitive Neuroscience*, 24(1), 61–79.
- 1073 Luria, R., Balaban, H., Awh, E., & Vogel, E. K. (2016). The contralateral delay activity as a  
1074 neural measure of visual working memory. *Neuroscience and Biobehavioral Reviews*,  
1075 34(5), 352–359.
- 1076 Luria, R., & Vogel, E. K. (2011). Shape and color conjunction stimuli are represented as  
1077 bound objects in visual working memory. *Neuropsychologia*, 49(6), 1632–1639.
- 1078 Oberauer, K. (2002). Access to Information in Working Memory: Exploring the Focus of  
1079 Attention. *Journal of Experimental Psychology: Learning Memory and Cognition*, 28(3),  
1080 411–421.
- 1081 Oostenveld, R., Fries, P., Maris, E., & Schoffelen, J. M. (2011). FieldTrip: Open source  
1082 software for advanced analysis of MEG, EEG, and invasive electrophysiological data.  
1083 *Computational Intelligence and Neuroscience*, 2011(1–9).
- 1084 Rihs, T. A., Michel, C. M., & Thut, G. (2007). Mechanisms of selective inhibition in visual  
1085 spatial attention are indexed by alpha-band EEG synchronization. *European Journal of*  
1086 *Neuroscience*, 25(2), 603–610.
- 1087 Rose, N. S., LaRocque, J. J., Riggall, A. C., Gosseries, O., Starrett, M. J., Mayering, E. E., & Postle,  
1088 B. R. (2016). Reactivation of latent working memories with transcranial magnetic  
1089 stimulation. *Science*, 354(6316), 1136–1139.
- 1090 Sauseng, P., Klimesch, W., Heise, K. F., Gruber, W. R., Holz, E., Karim, A. A., ... Hummel, F. C.  
1091 (2009). Brain Oscillatory Substrates of Visual Short-Term Memory Capacity. *Current*  
1092 *Biology*, 19(21), 1846–1852.
- 1093 Sauseng, P., Klimesch, W., Stadler, W., Schabus, M., Doppelmayr, M., Hanslmayr, S., ...  
1094 Birbaumer, N. (2005). A shift of visual spatial attention is selectively associated with  
1095 human EEG alpha activity. *European Journal of Neuroscience*, 22(11), 2917–2926.
- 1096 Sheremata, S. L., Somers, D. C., & Shomstein, S. (2018). Visual short-term memory activity in  
1097 parietal lobe reflects cognitive processes beyond attentional selection. *The Journal of*  
1098 *Neuroscience*, 38(6), 1716–17.
- 1099 Steinhauer, S., & Hakerem, G. (1992). The Pupillary Response in Cognitive  
1100 Psychophysiology and Schizophrenia. *Annals of the New York Academy of Sciences*,  
1101 658(1), 182–204.
- 1102 Stokes, M. G. (2015). “Activity-silent” working memory in prefrontal cortex: A dynamic  
1103 coding framework. *Trends in Cognitive Sciences*, 19(7), 394–405.
- 1104 Tas, A. C., Luck, S. J., & Hollingworth, A. (2016). The relationship between visual attention  
1105 and visual working memory encoding: A dissociation between covert and overt  
1106 orienting. *Journal of Experimental Psychology: Human Perception and Performance*,  
1107 42(8), 1121–1138.
- 1108 Thut, G., Nietzel, A., Brandt, S. A., & Pascual-Leone, A. (2006). Alpha Band  
1109 Electroencephalographic Activity over Occipital Cortex Indexes Visuospatial Attention

- 1110 Bias and Predicts Visual Target Detection. *Journal of Neuroscience*, 26(37), 9494–9502.
- 1111 Todd, J. J., & Marois, R. (2004). Capacity limit of visual short-term memory in human
- 1112 posterior parietal cortex. *Nature*, 428, 751–754.
- 1113 Unsworth, N., Fukuda, K., Awh, E., & Vogel, E. K. (2014). Working memory and fluid
- 1114 intelligence: Capacity, attention control, and secondary memory retrieval. *Cognitive*
- 1115 *Psychology*, 71, 1–26.
- 1116 van Dijk, H., van der Werf, J., Mazaheri, A., Medendorp, W. P., & Jensen, O. (2010).
- 1117 Modulations in oscillatory activity with amplitude asymmetry can produce cognitively
- 1118 relevant event-related responses. *Proceedings of the National Academy of Sciences*,
- 1119 107(2), 900–905.
- 1120 Vogel, E. K., & Machizawa, M. G. (2004). Neural activity predicts individual differences in
- 1121 visual working memory capacity. *Nature*, 428, 748–751.
- 1122 Vogel, E. K., Mccollough, A. W., & Machizawa, M. G. (2005). Neural measures reveal
- 1123 individual differences in controlling access to working memory. *Nature*, 438(7067),
- 1124 500–503.
- 1125 Wolff, M. J., Jochim, J., Akyurek, E. G., & Stokes, M. G. (2017). Dynamic hidden states
- 1126 underlying working memory guided behaviour. *Nature Neurosci.*, 1–35.
- 1127 Xu, Y., & Chun, M. M. (2006). Dissociable neural mechanisms supporting visual short-term
- 1128 memory for objects. *Nature*, 440, 91–95. Retrieved from
- 1129
